# Supplementary material for: Novel Isoxazole Derivative Attenuates Ethanol-Induced Gastric Mucosal Injury through Inhibition of H+/K+-ATPase Pump, Oxidative Stress and Inflammatory Pathways
Source: MDPI journal article supplement (doi:10.3390/molecules27165065), 2022-08-09
Supplement: s1 [file s1]

## Supplementary Data

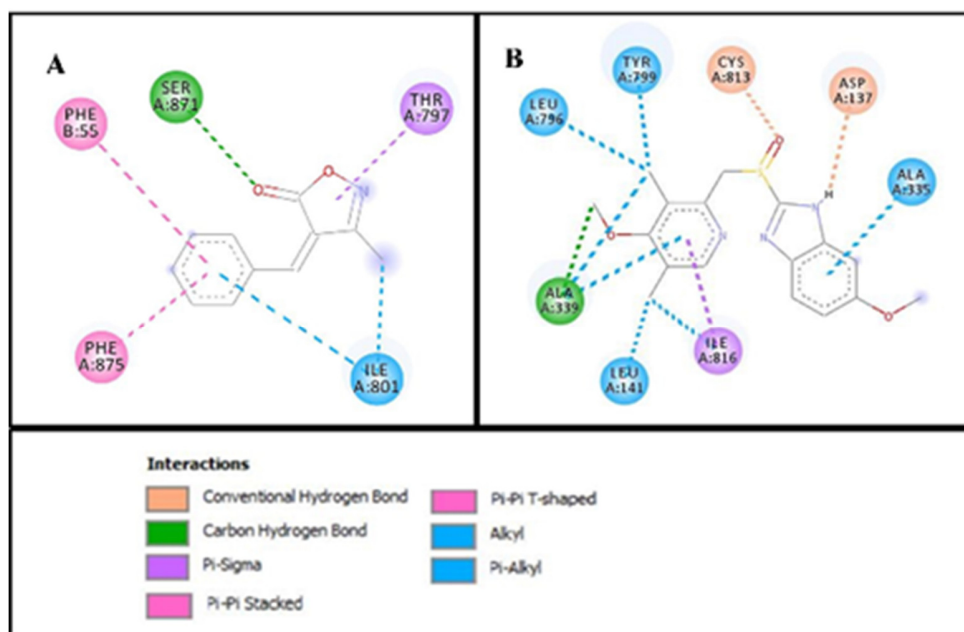

**Figure S1.** **A** and **B** represents 2D interactions of MBO and Omeprazole against target:  $H^+/K^+$ -ATPase respectively, evaluated through Biovia Discovery Studio 2016.

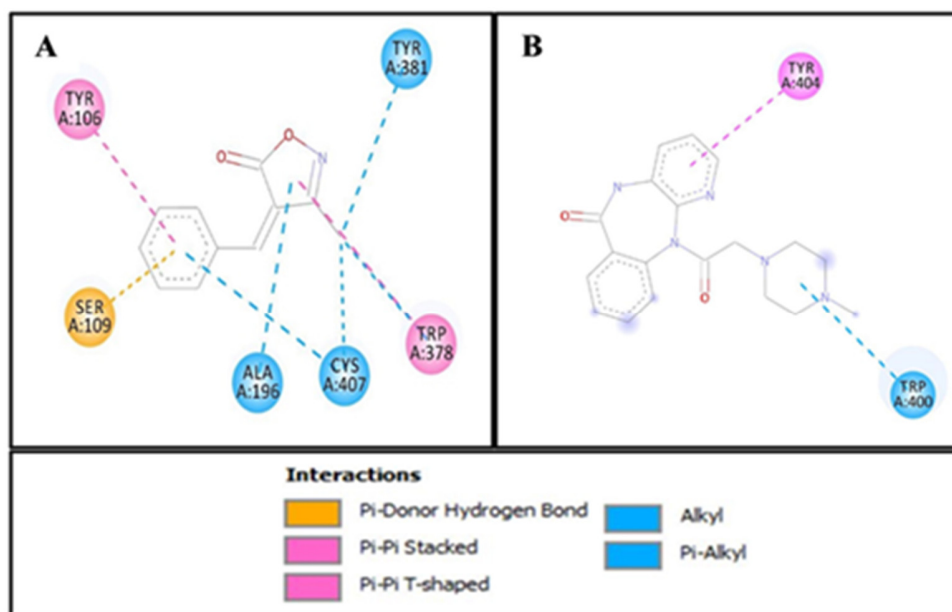

**Figure S2.** **A** and **B** represents 2D interactions of MBO and Pirenzepine against target: M1 respectively, evaluated through Biovia Discovery Studio 2016.

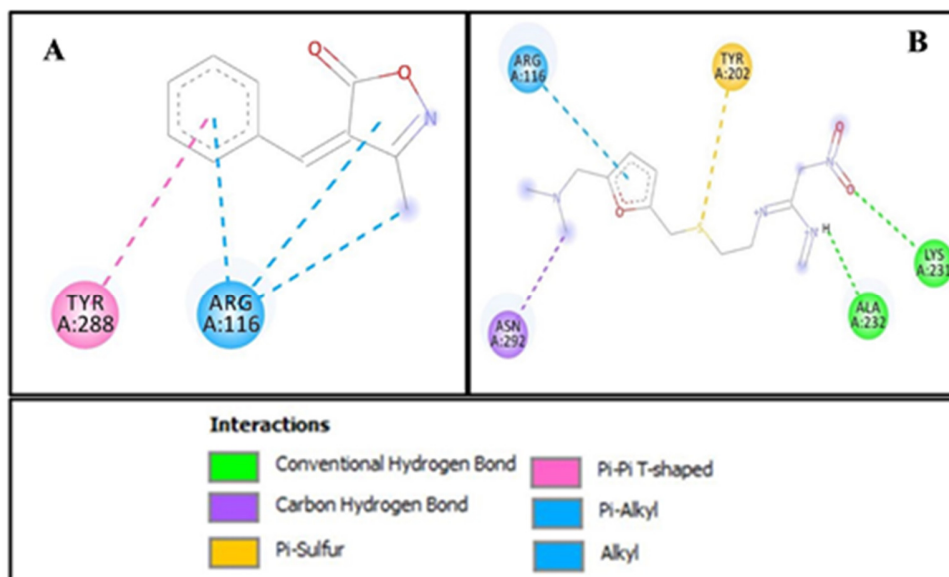

**Figure S3.** **A** and **B** represents 2D interactions of MBO and Ranitidine against target: H<sub>2</sub> respectively, evaluated through Biovia Discovery Studio 2016.

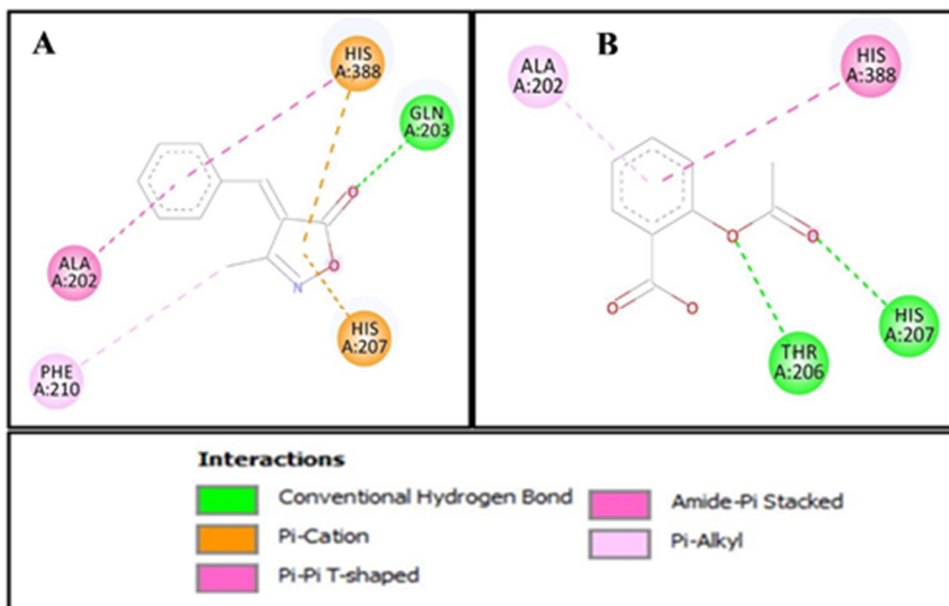

**Figure S4.** **A** and **B** represents 2D interactions of MBO and Aspirin against target: COX-1 respectively, evaluated through Biovia Discovery Studio 2016.

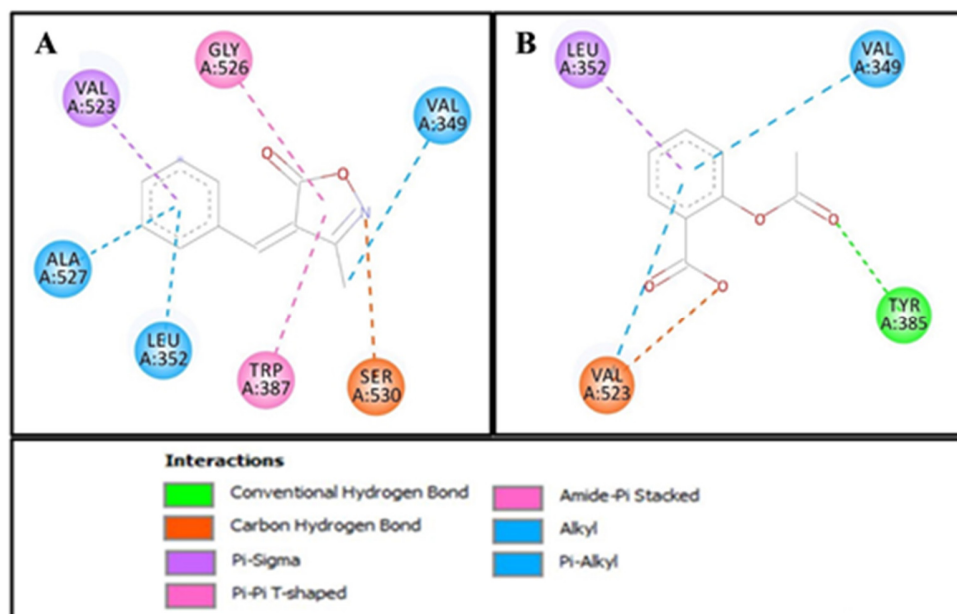

**Figure S5.** **A** and **B** represents 2D interactions of MBO and Aspirin against target: COX-2 respectively, evaluated through Biovia Discovery Studio 2016.

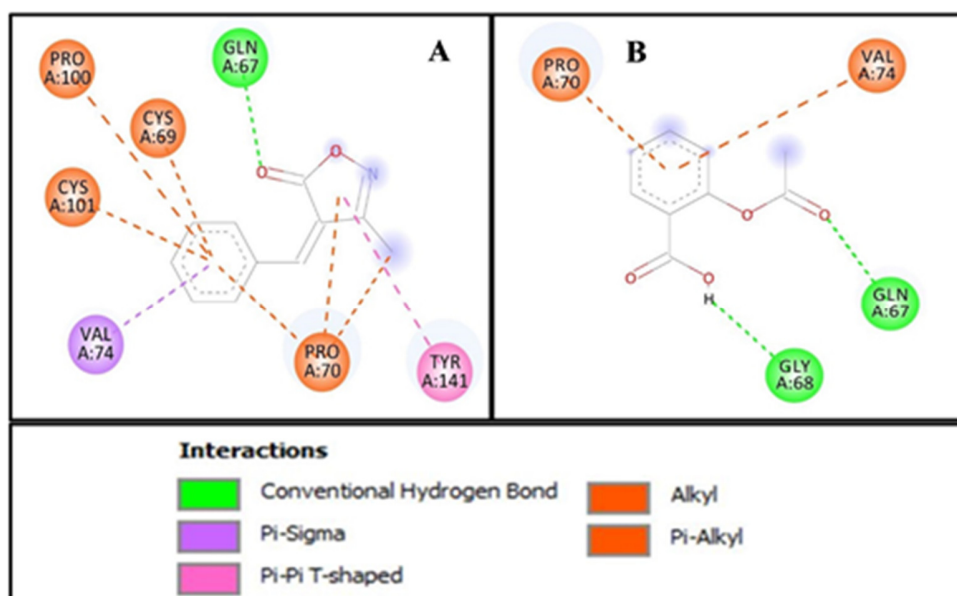

**Figure S6.** **A** and **B** represents 2D interactions of MBO and Aspirin against target: TNF- $\alpha$  respectively, evaluated through Biovia Discovery Studio 2016.

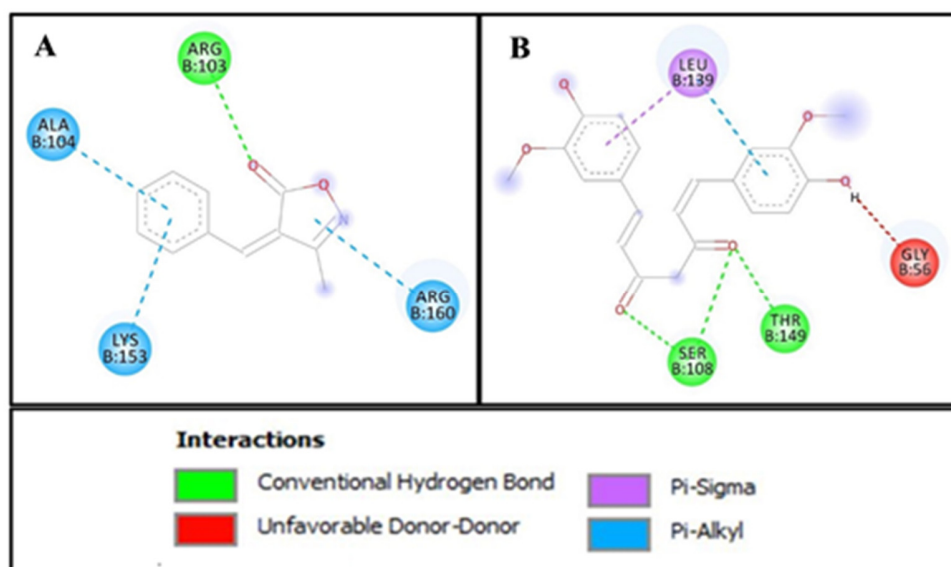

**Figure S7.** **A** and **B** represents 2D interactions of MBO and Curcumin against target: NFkB respectively, evaluated through Biovia Discovery Studio 2016.

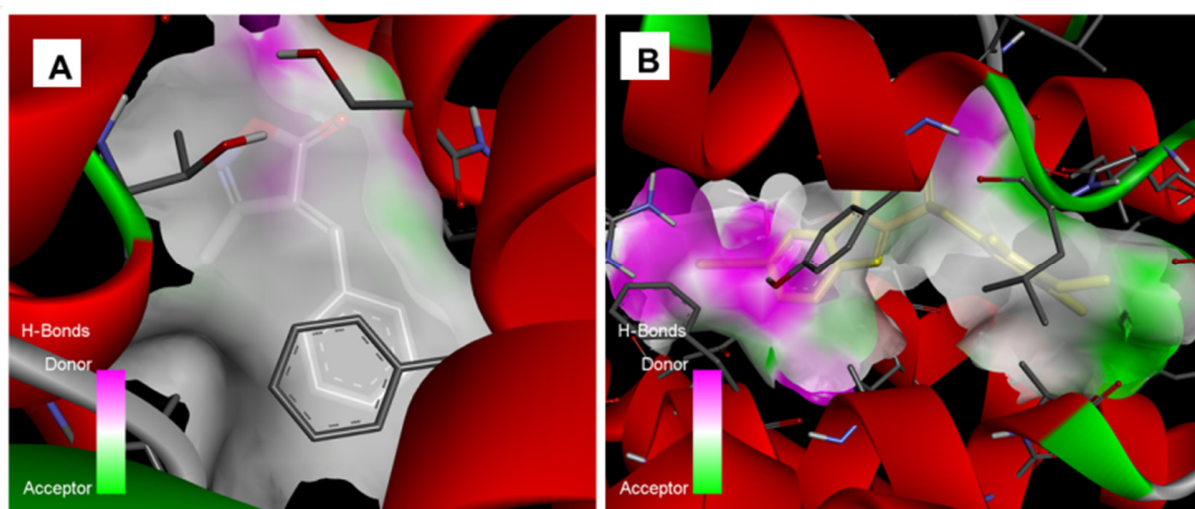

**Figure S8.** **A** and **B** represents 3D interactions of MBO and Omeprazole against target:  $H^+/K^+$ -ATPase respectively, evaluated through Biovia Discovery Studio 2016

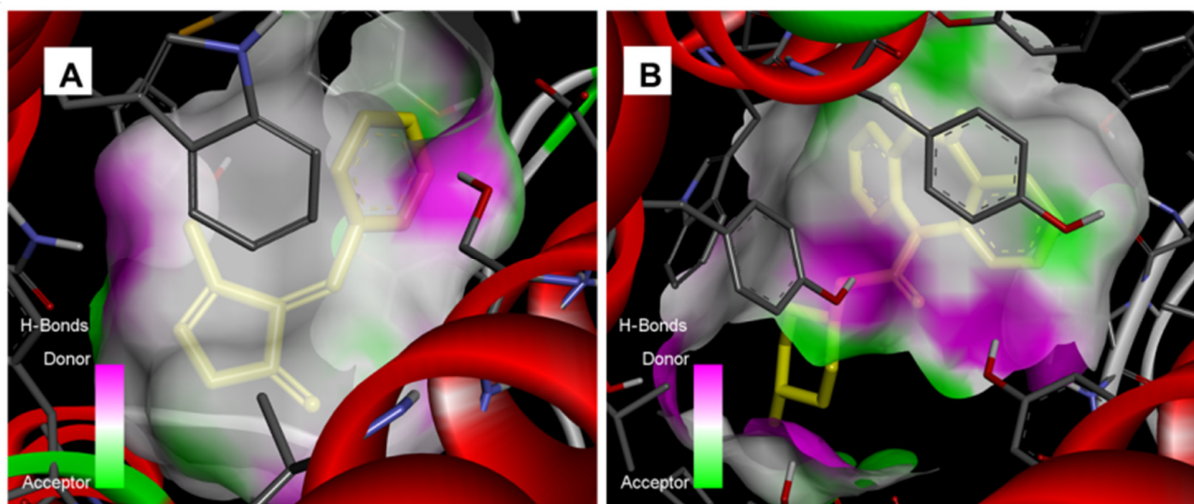

**Figure S9.** A and B represents 3D interactions of MBO and Pirenzepine against target: M1 respectively, evaluated through Biovia Discovery Studio 2016.

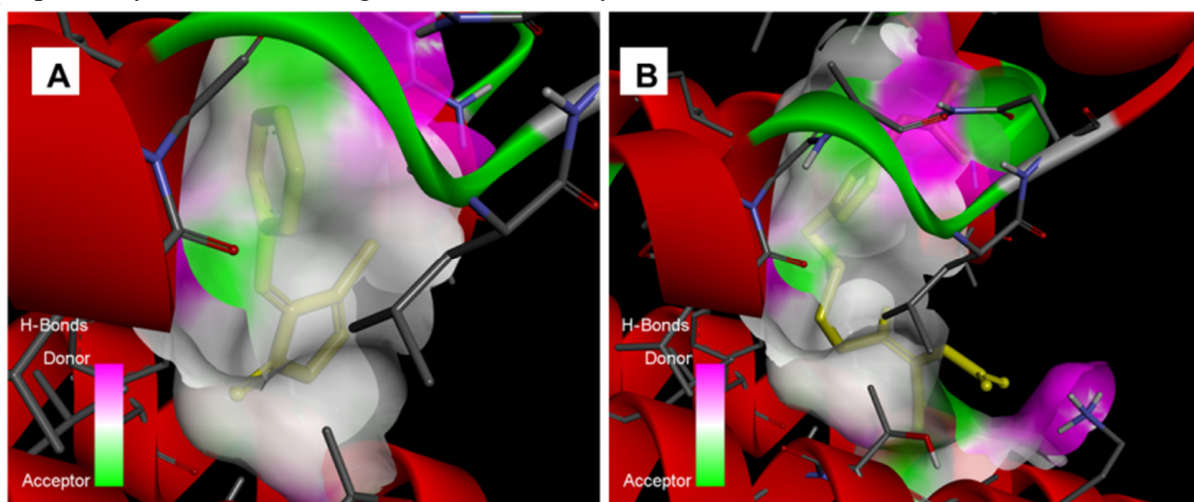

**Figure S10.** A and B represents 3D interactions of MBO and Ranitidine against target: H2 respectively, evaluated through Biovia Discovery Studio 2016.



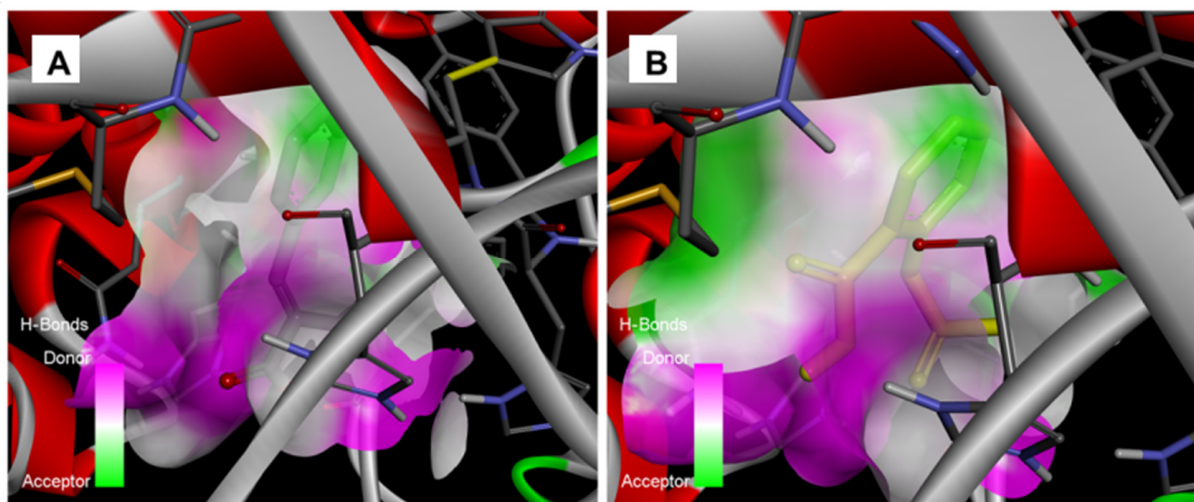

**Figure S11.** A and B represents 3D interactions of MBO and Aspirin against target: COX-1 respectively, evaluated through Biovia Discovery Studio 2016.

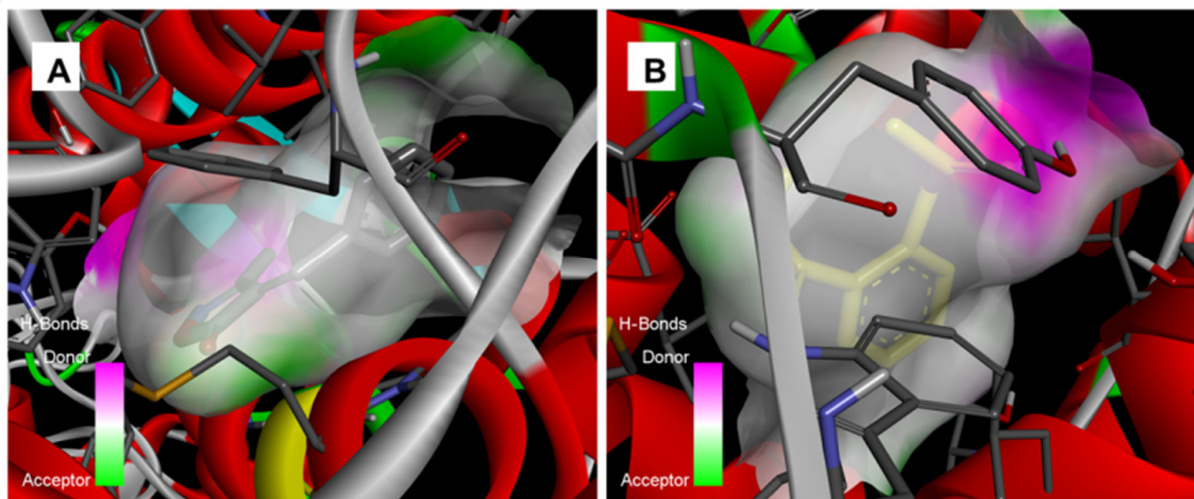

**Figure S12.** A and B represents 3D interactions of MBO and Aspirin against target: COX-2 respectively, evaluated through Biovia Discovery Studio 2016.

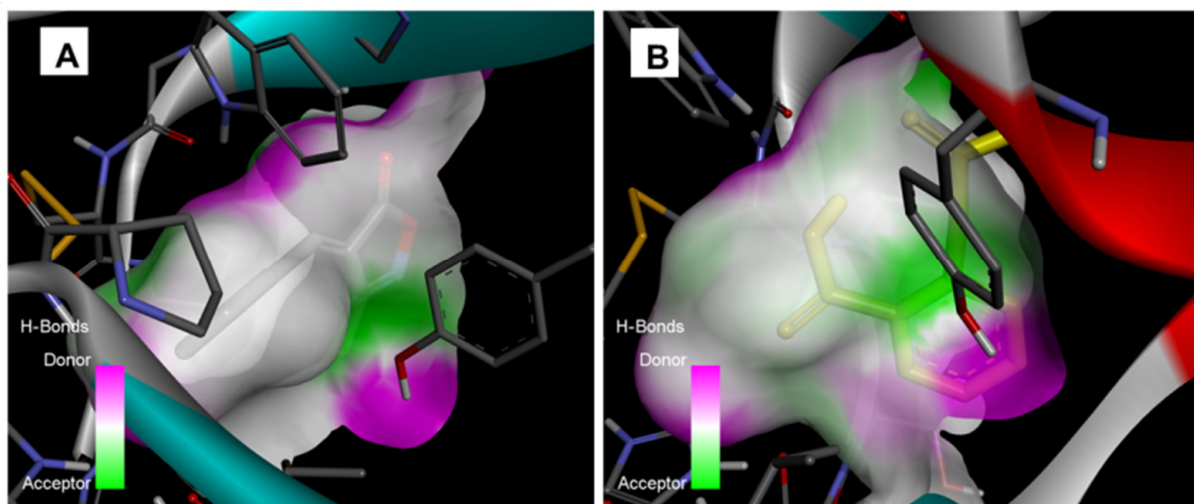

**Figure S13.** A and B represents 3D interactions of MBO and Aspirin against target: TNF- $\alpha$  respectively, evaluated through Biovia Discovery Studio 2016.

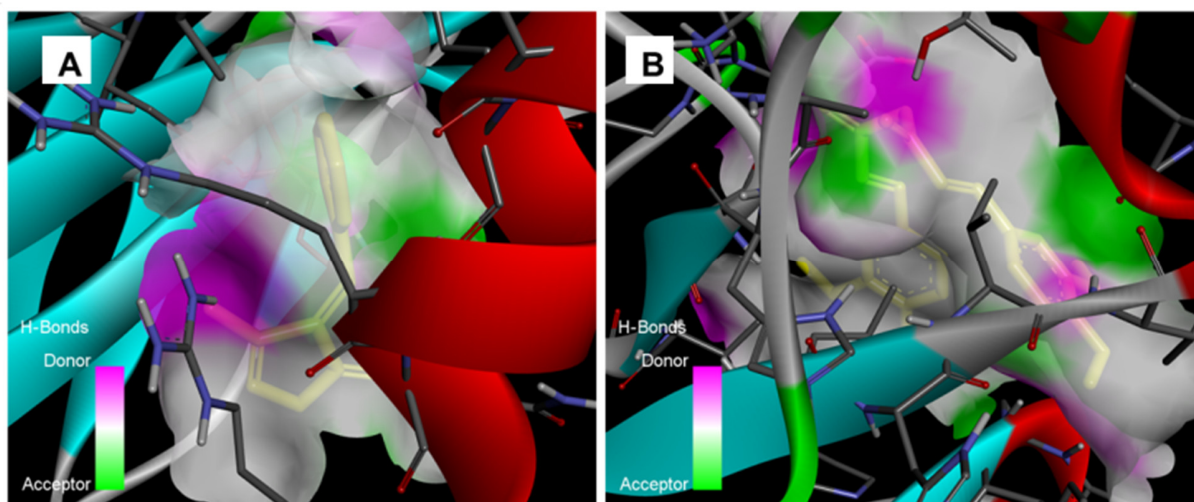

**Figure S14.** A and B represents 3D interactions of MBO and Curcumin against target: NF $\kappa$ B respectively, evaluated through Biovia Discovery Studio 2016.
